- Muti C, Plauchu H, Robinson PN, Ades LC, Biggin A, Benetts B, Brett M, Holman KJ, De Backer J, Coucke P, Francke U, DePaepe A, Jondeau G, Boileau C. Effect of mutation type and location on clinical outcome in 1,013 probands with Marfan syndrome or related phenotypes and FBN1 mutations: an international study. *Am J Hum Genet* 2007;**81**:454–66.
12. Baudhuin LM, Kotzer KE, Lagerstedt SA. Increased frequency of FBN1 truncating and splicing variants in Marfan syndrome patients with aortic events. *Genet Med* 2015;**17**:177–187.
13. Hutchinson S, Furger A, Halliday D, Judge DP, Jefferson A, Dietz HC, Firth H, Handford PA. Allelic variation in normal human FBN1 expression in a family with Marfan syndrome: a potential modifier of phenotype? *Hum Mol Genet* 2003;**12**:2269–2276.
14. Aubart M, Gross MS, Hanna N, Zabot MT, Sznajder M, Detaint D, Gouya L, Jondeau G, Boileau C, Stheneur C. The clinical presentation of Marfan syndrome is modulated by expression of wild-type FBN1 allele. *Hum Mol Genet* 2015;**24**:2764–2770.
15. Aoyama T, Francke U, Gasner C, Furthmayr H. Fibrillin abnormalities and prognosis in Marfan syndrome and related disorders. *Am J Med Genet* 1995;**58**:169–176.
16. Franken R, Groenink M, de Waard V, Feenstra HMA, Scholte AJ, van den Berg MP, Pals G, Zwinderman AH, Timmermans J, Mulder BJM. Genotype impacts survival in Marfan syndrome. *Eur Heart J* 2016;**37**:3285–3290.

## CARDIOVASCULAR FLASHLIGHT

doi:10.1093/eurheartj/ehw178

Online publish-ahead-of-print 8 May 2016

### Tears are words that heart cannot express

Mario Iannaccone\*, Federico Conrotto, Mauro Pennone, and Maurizio D'Amico

'Città della Scienza e della Salute', Department of Cardiology, University of Turin, Turin, Italy

\* Corresponding author. Tel: +39 0116336023, Fax: +39 0116335057, Email: [mario.iannaccone@hotmail.it](mailto:mario.iannaccone@hotmail.it)

*Tears are the silent language of grief*

François-Marie Arouet, 'Voltaire'

A 42-year-old man, with low cardiovascular risk profile, presented to our observation with typical chest pain and ST-depression in inferior leads at ECG. Because of the presence of subcritical coronary artery stenosis at coronary angiography (Panel A), the patient was discharged with the diagnosis of 'Myocardial Infarction With Non-Obstructive Coronary Arteries'. After 1 week, the patient presented again to our emergency department with continuous chest pain, diffuse ST-depression at ECG, and Troponin T elevation. Cardiac magnetic resonance revealed inferior myocardial ischaemia. Coronary angiography showed right coronary artery critical stenosis with TIMI 2 flow (Panel B). Optical coherence tomography (OCT) disclosed large intimal tear with thrombus apposition in the distal right coronary artery lumen (Panels C–E; Supplementary material online, Video S1), while intravascular ultrasound (IVUS) showed intramural haematoma (Panel F). Cutting balloon angioplasty was effective to restore coronary flow and to limit haematoma propagation. Then, two nitinol, self-expanding, and coronary stents (STENTYS® stent; STENTYS, Paris, France) were successfully deployed.

Angiographic diagnosis of spontaneous coronary artery dissection relies on the visualization of double lumen due to contrast filling into the false lumen. However, its diagnostic value is limited especially in case of wall haemorrhage without communication with the lumen. In our case, it could be speculated that an imaging technique (OCT or IVUS) added at the first angiography would have allowed an early identification of the intimal flap or of the intramural hematoma.

Supplementary material is available at *European Heart Journal* online.

Published on behalf of the European Society of Cardiology. All rights reserved. © The Author 2016. For permissions please email: [journals.permissions@oup.com](mailto:journals.permissions@oup.com).

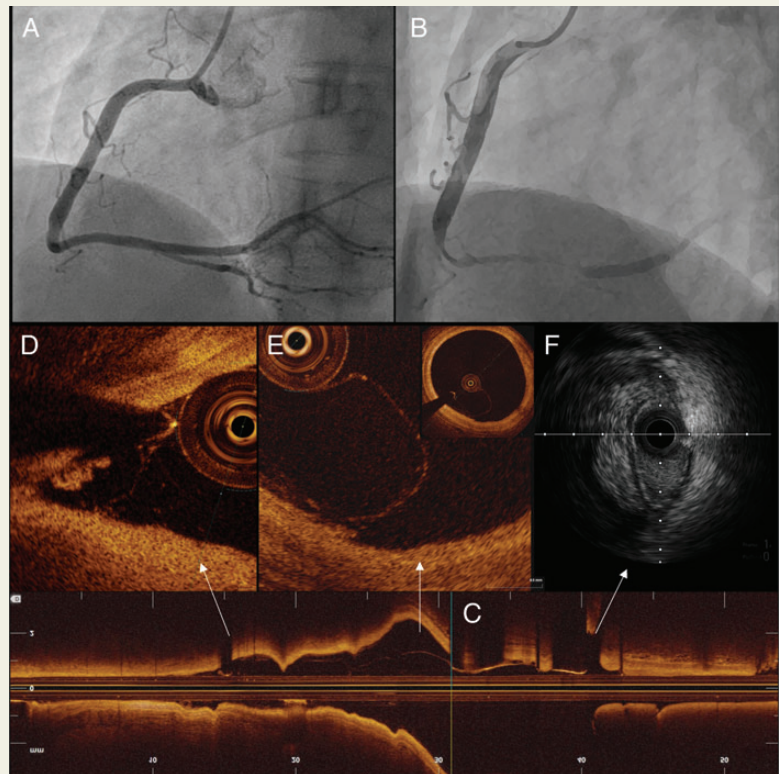

Source: http://academic.oup.com/eurheartj/article-pdf/37/43/3293/8326019/ehw241.pdf
